# Supplementary material
Source: Springer Nature journal article supplement (https://www.springermedizin.de/resource/supplementary/13023_2012_508_MOESM1_ESM.pdf/9642730)
Supplement: MOESM1 [file 9642730]

# Protocol A

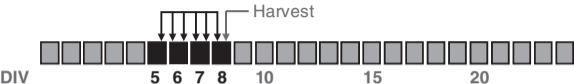

# Protocol B

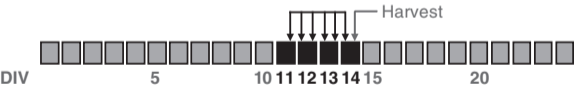

early development, neurite outgrowth

aggregation

neuronal differentiation, myelination
